# Supplementary material for: Enhanced photocatalytic activity of quantum-confined tungsten trioxide nanoparticles in mesoporous silica
Source: Royal Society of Chemistry journal article supplement (doi:10.1039/c0cc00540a), 2010-01-01
Supplement: c0cc00540a.pdf [file c0cc00540a.pdf]

# Enhanced photocatalytic activity of quantum-confined tungsten trioxide nanoparticles in mesoporous silica

Daisuke Tanaka, Yuya Oaki and Hiroaki Imai\*

*D. Tanaka, Dr. Y. Oaki and Prof. H. Imai, Department of Applied Chemistry, Faculty of Science and Technology, Keio University, 3-14-1 Hiyoshi, Kohoku-ku, Yokohama, 223-8522, Japan.  
Fax: +81-45-566-1551 E-mail: hiroaki@aplc.keio.ac.jp*

## Supporting Information

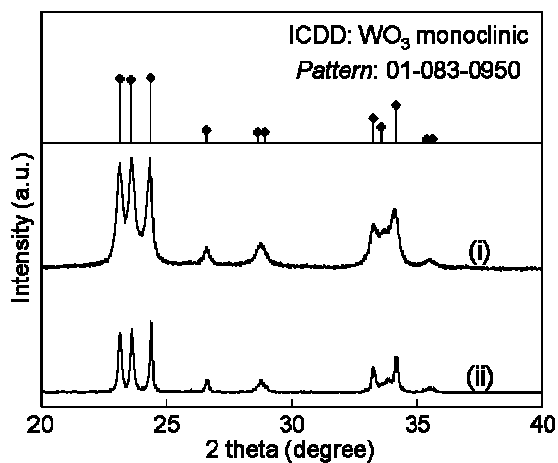

Fig. S1 Powder X-ray diffraction patterns of WO<sub>3</sub> particles prepared without a silica matrix (i) and commercial WO<sub>3</sub> powder (ii).
